# Supplementary material
Source: MDPI journal article supplement (https://www.mdpi.com/2073-4395/10/3/317)
Supplement: s1 [file s1]

**Table S1.** Herbicide safening effect of compound (**l**, **n**, **r** and **u**) on the rice seedlings treated with metolachlor in plant heights <sup>1</sup>.

| Compound     | Concentration<br>(mg L <sup>-1</sup> ) | plant height relative value (% of<br>Non-Treated Control) |
|--------------|----------------------------------------|-----------------------------------------------------------|
| <b>F + M</b> | 0.25                                   | 54.76 ± 0.91                                              |
|              | 0.5                                    | 63.44 ± 1.29                                              |
|              | 1                                      | 69.86 ± 0.79                                              |
|              | 2                                      | 74.20 ± 0.88                                              |
|              | 4                                      | 84.39 ± 0.58                                              |
| <b>l + M</b> | 0.25                                   | 66.39 ± 1.43                                              |
|              | 0.5                                    | 68.42 ± 1.00                                              |
|              | 1                                      | 76.02 ± 0.62                                              |
|              | 2                                      | 89.97 ± 0.35                                              |
|              | 4                                      | 94.51 ± 0.33                                              |
| <b>n + M</b> | 0.25                                   | 52.88 ± 0.56                                              |
|              | 0.5                                    | 55.64 ± 0.66                                              |
|              | 1                                      | 65.57 ± 0.60                                              |
|              | 2                                      | 88.69 ± 0.82                                              |
|              | 4                                      | 95.23 ± 1.01                                              |
| <b>r + M</b> | 0.25                                   | 54.74 ± 1.16                                              |
|              | 0.5                                    | 68.26 ± 0.94                                              |
|              | 1                                      | 75.04 ± 0.51                                              |
|              | 2                                      | 92.44 ± 0.20                                              |
|              | 4                                      | 98.69 ± 0.47                                              |
| <b>u + M</b> | 0.25                                   | 59.05 ± 1.29                                              |
|              | 0.5                                    | 69.85 ± 0.25                                              |
|              | 1                                      | 72.64 ± 0.27                                              |
|              | 2                                      | 77.80 ± 0.63                                              |
|              | 4                                      | 91.84 ± 0.48                                              |

<sup>1</sup> **M**: 0.073 mg L<sup>-1</sup> metolachlor; **F + M**: combined treatment fenclorim and metolachlor, (**l**, **n**, **r** or **u**) + **M**: combined treatment of compounds (**l**, **n**, **r** or **u**) and metolachlor. All experiments were performed in triplicate.

**Table S2.** Herbicide safening effect of compound (**l**, **n**, **r** and **u**) on the rice seedlings treated with metolachlor in root lengths <sup>1</sup>.

| Compound     | Concentration<br>(mg L <sup>-1</sup> ) | Root Lengths Relative Value (% of<br>Non-Treated Control) |
|--------------|----------------------------------------|-----------------------------------------------------------|
| <b>F + M</b> | 0.25                                   | 65.89 ± 0.90                                              |
|              | 0.5                                    | 73.02 ± 0.83                                              |
|              | 1                                      | 82.63 ± 0.47                                              |
|              | 2                                      | 86.81 ± 1.02                                              |
|              | 4                                      | 91.10 ± 1.11                                              |
| <b>l + M</b> | 0.25                                   | 71.57 ± 0.90                                              |
|              | 0.5                                    | 84.08 ± 0.88                                              |
|              | 1                                      | 94.38 ± 0.35                                              |
|              | 2                                      | 86.79 ± 1.69                                              |
|              | 4                                      | 83.48 ± 0.59                                              |
| <b>n + M</b> | 0.25                                   | 82.20 ± 0.35                                              |
|              | 0.5                                    | 85.82 ± 1.16                                              |
|              | 1                                      | 87.61 ± 0.76                                              |
|              | 2                                      | 89.04 ± 1.12                                              |
|              | 4                                      | 93.07 ± 0.54                                              |
| <b>r + M</b> | 0.25                                   | 61.21 ± 0.96                                              |
|              | 0.5                                    | 72.22 ± 1.11                                              |
|              | 1                                      | 87.24 ± 0.78                                              |
|              | 2                                      | 92.12 ± 0.46                                              |
|              | 4                                      | 97.55 ± 0.68                                              |
| <b>u + M</b> | 0.25                                   | 81.17 ± 0.55                                              |
|              | 0.5                                    | 88.38 ± 0.65                                              |
|              | 1                                      | 91.60 ± 0.95                                              |
|              | 2                                      | 93.92 ± 0.69                                              |
|              | 4                                      | 94.51 ± 1.28                                              |

<sup>1</sup> **M**: 0.073 mg L<sup>-1</sup> metolachlor; **F + M**: combined treatment fenclorim and metolachlor, (**l**, **n**, **r** or **u**) + **M**: combined treatment of compounds (**l**, **n**, **r** or **u**) and metolachlor. All experiments were performed in triplicate.

**Table S3.** Herbicide safening effect of compound (**l**, **n**, **r** and **u**) on the rice seedlings treated with metolachlor in fresh weight <sup>1</sup>.

| Compound.    | Concentration<br>(mg L <sup>-1</sup> ) | Fresh Weight Relative Value (%<br>of Non-Treated Control) |
|--------------|----------------------------------------|-----------------------------------------------------------|
| <b>F + M</b> | 0.25                                   | 84.61 ± 0.74                                              |
|              | 0.5                                    | 84.14 ± 0.87                                              |
|              | 1                                      | 90.13 ± 0.46                                              |
|              | 2                                      | 93.01 ± 0.05                                              |
|              | 4                                      | 96.55 ± 1.08                                              |
| <b>l + M</b> | 0.25                                   | 89.17 ± 1.26                                              |
|              | 0.5                                    | 92.62 ± 1.02                                              |
|              | 1                                      | 93.37 ± 0.53                                              |
|              | 2                                      | 94.28 ± 0.92                                              |
|              | 4                                      | 96.73 ± 0.76                                              |
| <b>n + M</b> | 0.25                                   | 82.89 ± 0.92                                              |
|              | 0.5                                    | 85.04 ± 0.65                                              |
|              | 1                                      | 86.92 ± 1.24                                              |
|              | 2                                      | 97.43 ± 0.46                                              |
|              | 4                                      | 97.85 ± 0.70                                              |
| <b>r + M</b> | 0.25                                   | 76.91 ± 0.60                                              |
|              | 0.5                                    | 87.85 ± 0.50                                              |
|              | 1                                      | 92.57 ± 0.69                                              |
|              | 2                                      | 97.44 ± 0.46                                              |
|              | 4                                      | 98.72 ± 0.23                                              |
| <b>u + M</b> | 0.25                                   | 86.05 ± 0.55                                              |
|              | 0.5                                    | 87.59 ± 1.89                                              |
|              | 1                                      | 95.30 ± 1.15                                              |
|              | 2                                      | 92.03 ± 1.09                                              |
|              | 4                                      | 95.78 ± 0.88                                              |

<sup>1</sup> **M**: 0.073 mg L<sup>-1</sup> metolachlor; **F + M**: combined treatment fenclorim and metolachlor, (**l**, **n**, **r** or **u**) + **M**: combined treatment of compounds (**l**, **n**, **r** or **u**) and metolachlor. All experiments were performed in triplicate.
